# Supplementary material for: Foro medioambiental de la ONU. Por una economía ecológica.
Source: Springer Nature journal article supplement (doi:10.1007/s40121-021-00411-z), 2009-01-01
Supplement: MOESM2 [file 18887264]

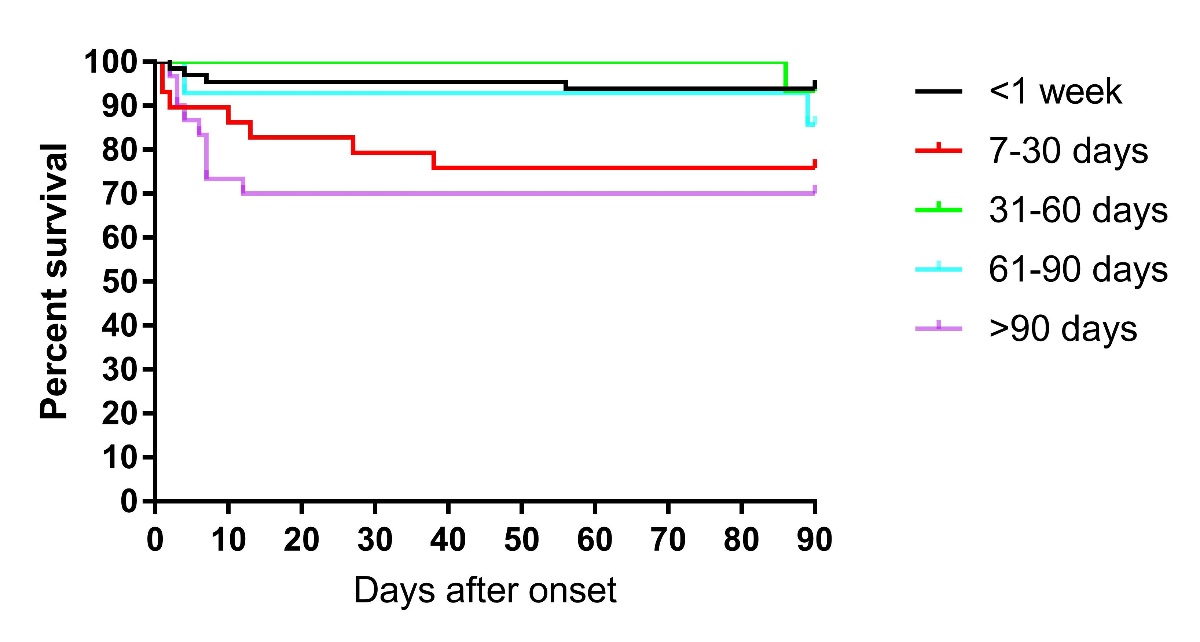


Figure S2 Kaplan–Meier survival curves estimated survival rates between 5 time-point after transplantation.

Statistical significance (Log Rank test):

1. <1 week vs. >90 days (93.8% vs 70%), *P*=0.001
2. <1 week vs. 7-30 days (93.8% vs. 75.9%), *P*=0.011
